# Supplementary material
Source: MDPI journal article supplement (https://www.mdpi.com/2673-9992/21/1/10)
Supplement: s1 [file s1]

# Identification of Potential Protein Biomarkers in a Depressed Chinese Malaysian University Student using Liquid Chromatography-tandem Mass Spectrometry

---

YAP SIN YEE

UNIVERSITI TUNKU ABDUL RAHMAN, MALAYSIA

# Depression in Malaysia

- Mental disorder is one of the biggest health issues affecting Malaysians.

|                                                         | National Health and Morbidity Survey 1996 | National Health and Morbidity Survey 2006 | National Health and Morbidity Survey 2015 |
|---------------------------------------------------------|-------------------------------------------|-------------------------------------------|-------------------------------------------|
| Prevalence of psychiatric morbidity (5 to 15 years old) | 13%                                       | 20.3%                                     | 12.1%                                     |
| 16 and above                                            | 10.6%                                     | 11.2%                                     | 29.2%                                     |

Image source: Suicide on the rise among Malaysian youth: New Straits Times (online)

# Depression in Malaysia

---

- ❑ National Health and Morbidity Survey 2019 reported that nearly **half a million** of Malaysian adults suffered from depression.
- ❑ A 2020 study reported that **42.3%** of Malaysian adults had depression.
- ❑ Another nationwide survey among general population has showed an alarming prevalent rate of depression (**59.2%**) during the COVID-19 pandemic.
  - The prevalence of depression was apparently increasing.

# Depression among university students

---

- ❑ Depression often develops at a young age and is often recurring.
- ❑ 18-29 year olds are **three times more likely** to be depressed than people of 60 year olds and above.
- ❑ University students are experiencing a stressful period:
  - Academic stress
  - Financial problems
  - Concern for their future
- ❑ Makes them more vulnerable to depression.

# Depression among university students in Malaysia

Prevalence of depression among university students in Malaysia (%)

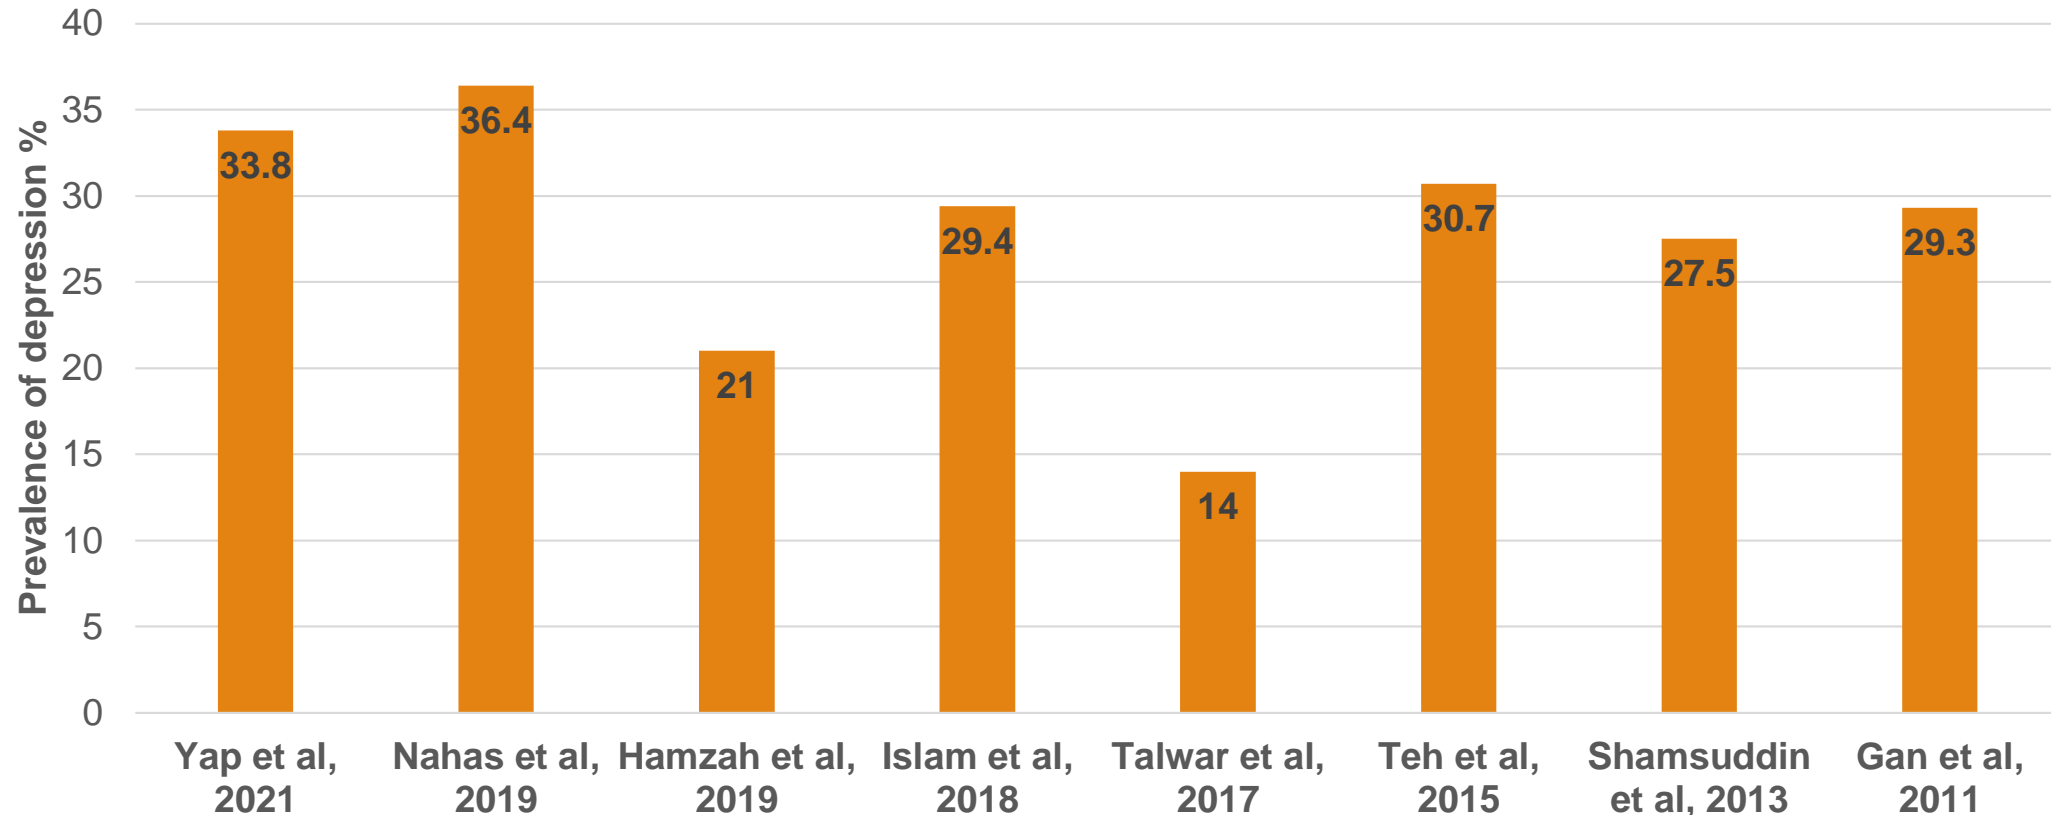

# Diagnosis and treatment of depression

---

- ❑ To date, the etiology of depression is not fully understood yet.
- ❑ There is no clinical laboratory tests available for the diagnosis of depression due to its complex nature.
- ❑ Currently, the diagnosis and treatment of depression is superior to symptom-based.

# Diagnosis and treatment of depression

---

## □ Screening:

- Questionnaires

## □ Diagnosis:

- Patients' descriptions of symptoms
- Clinical behavior observations
- Diagnostic criteria (DSM-5 & ICD-11)

## □ Patients' management:

- Refer to psychiatric services
- Admit to the psychiatric ward

## □ There is a need for a convenient and effective way to detect depression:

- Biomarker

# Biomarker

---

- ❑ Biomarker is any measurable indicator of the state of a body.
- ❑ A biomarker can be a gene or a group of genes, proteins or other biomolecules.
- ❑ Bodily fluids like blood, urine, and cerebral spinal fluid are one of the easily accessible sources of psychiatric biomarkers.



# Protein markers of depression

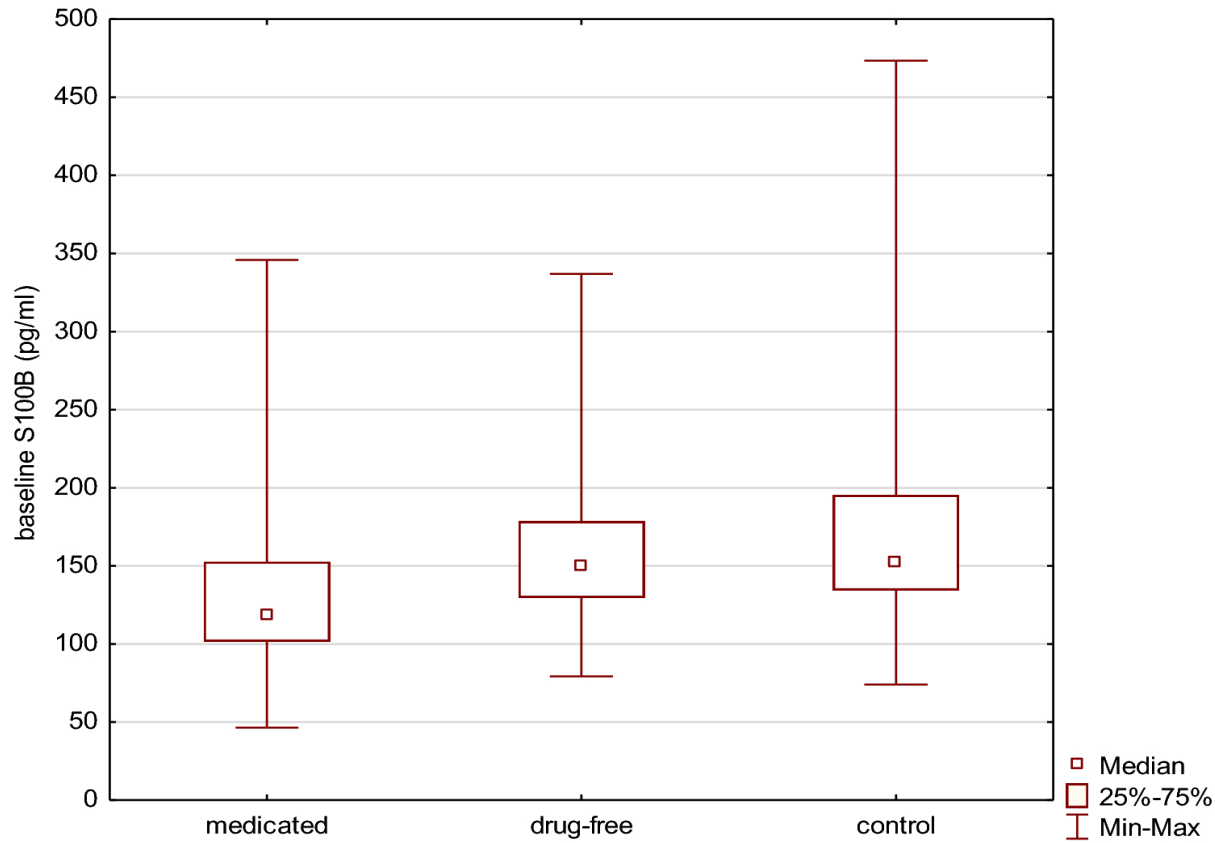

- Serum S100B were found to be lower in medicated youth patients, compared with those who were drug-free, and healthy controls.

# Protein markers of depression

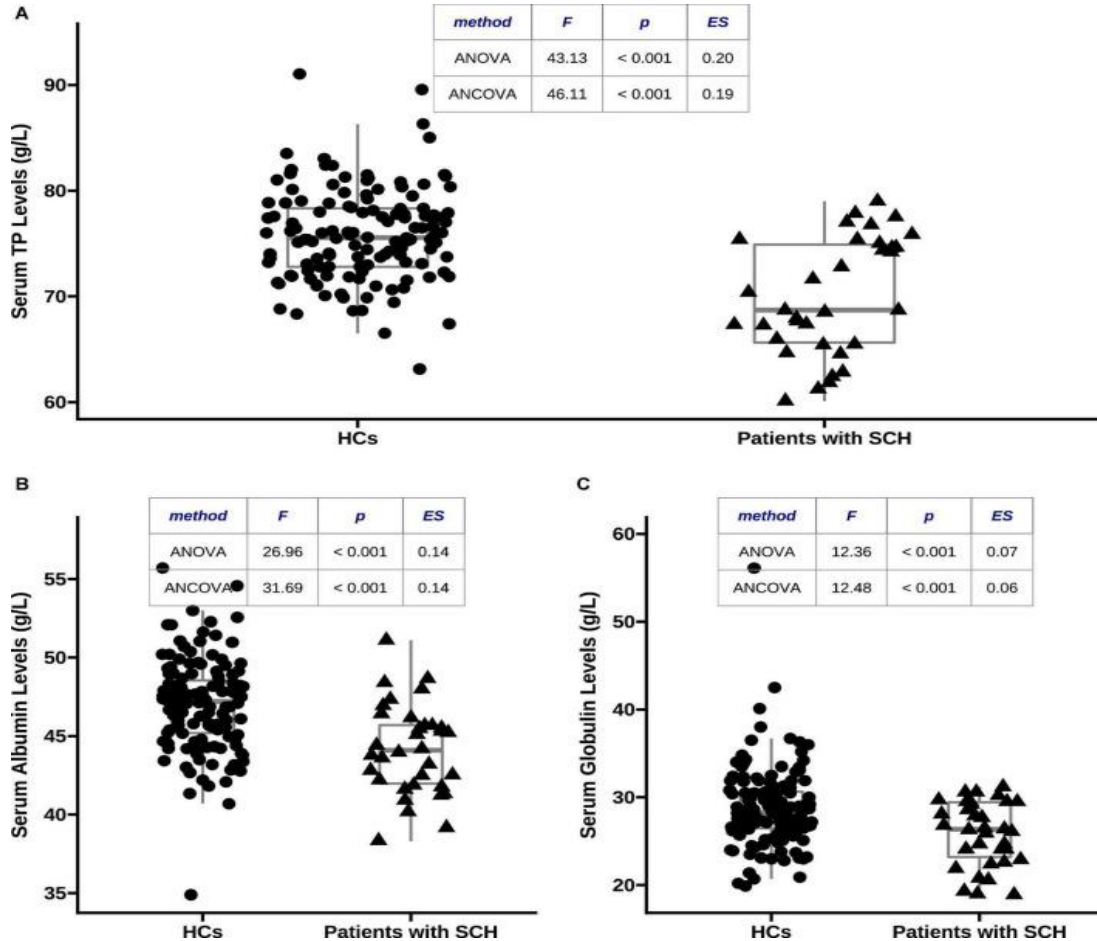

Decreased serum **total proteins**, **albumin**, and **globulin** were found associated with depressive severity in schizophrenia.

# Protein markers of depression

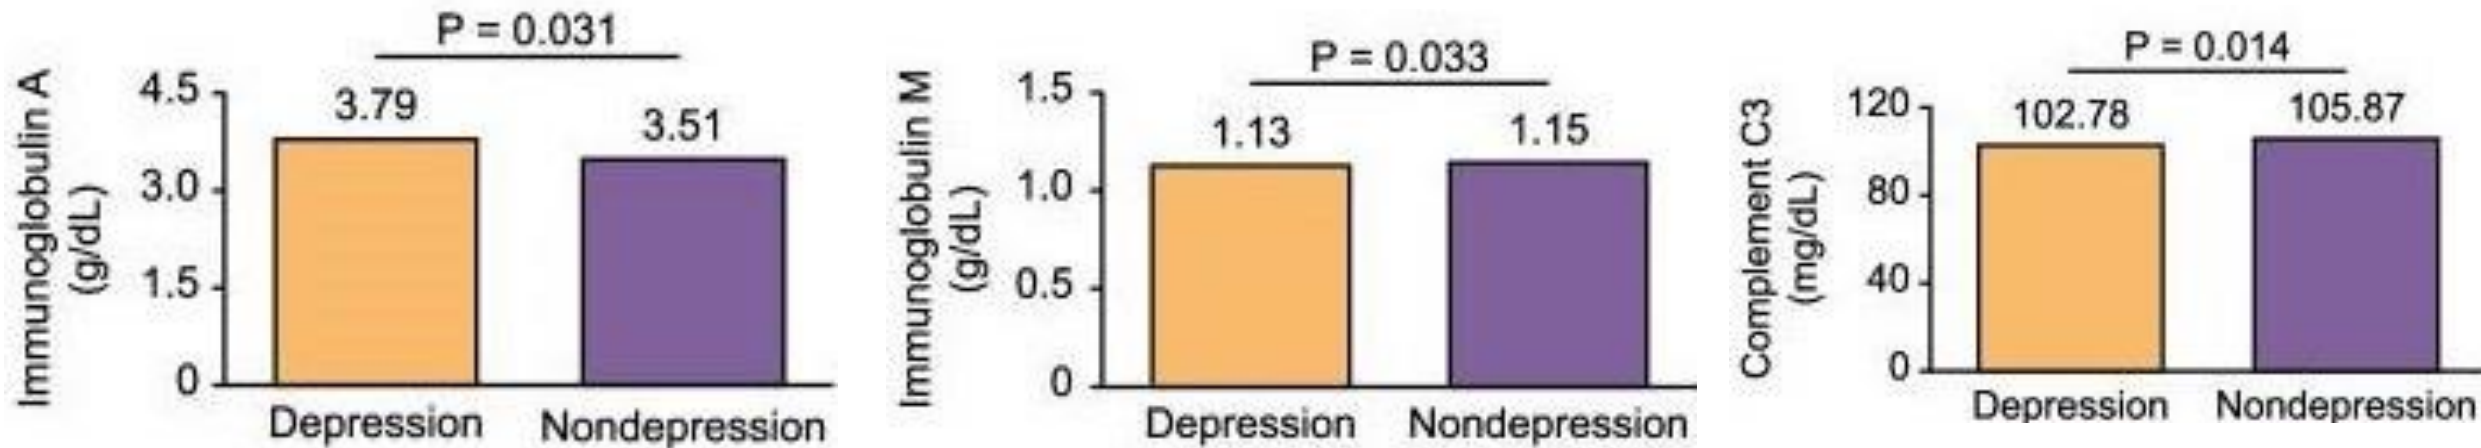

- Chinese older adults with depression had higher levels of **immunoglobulin A** and lower levels **immunoglobulin M** and **complement C3** than the group without depression.

# Our results

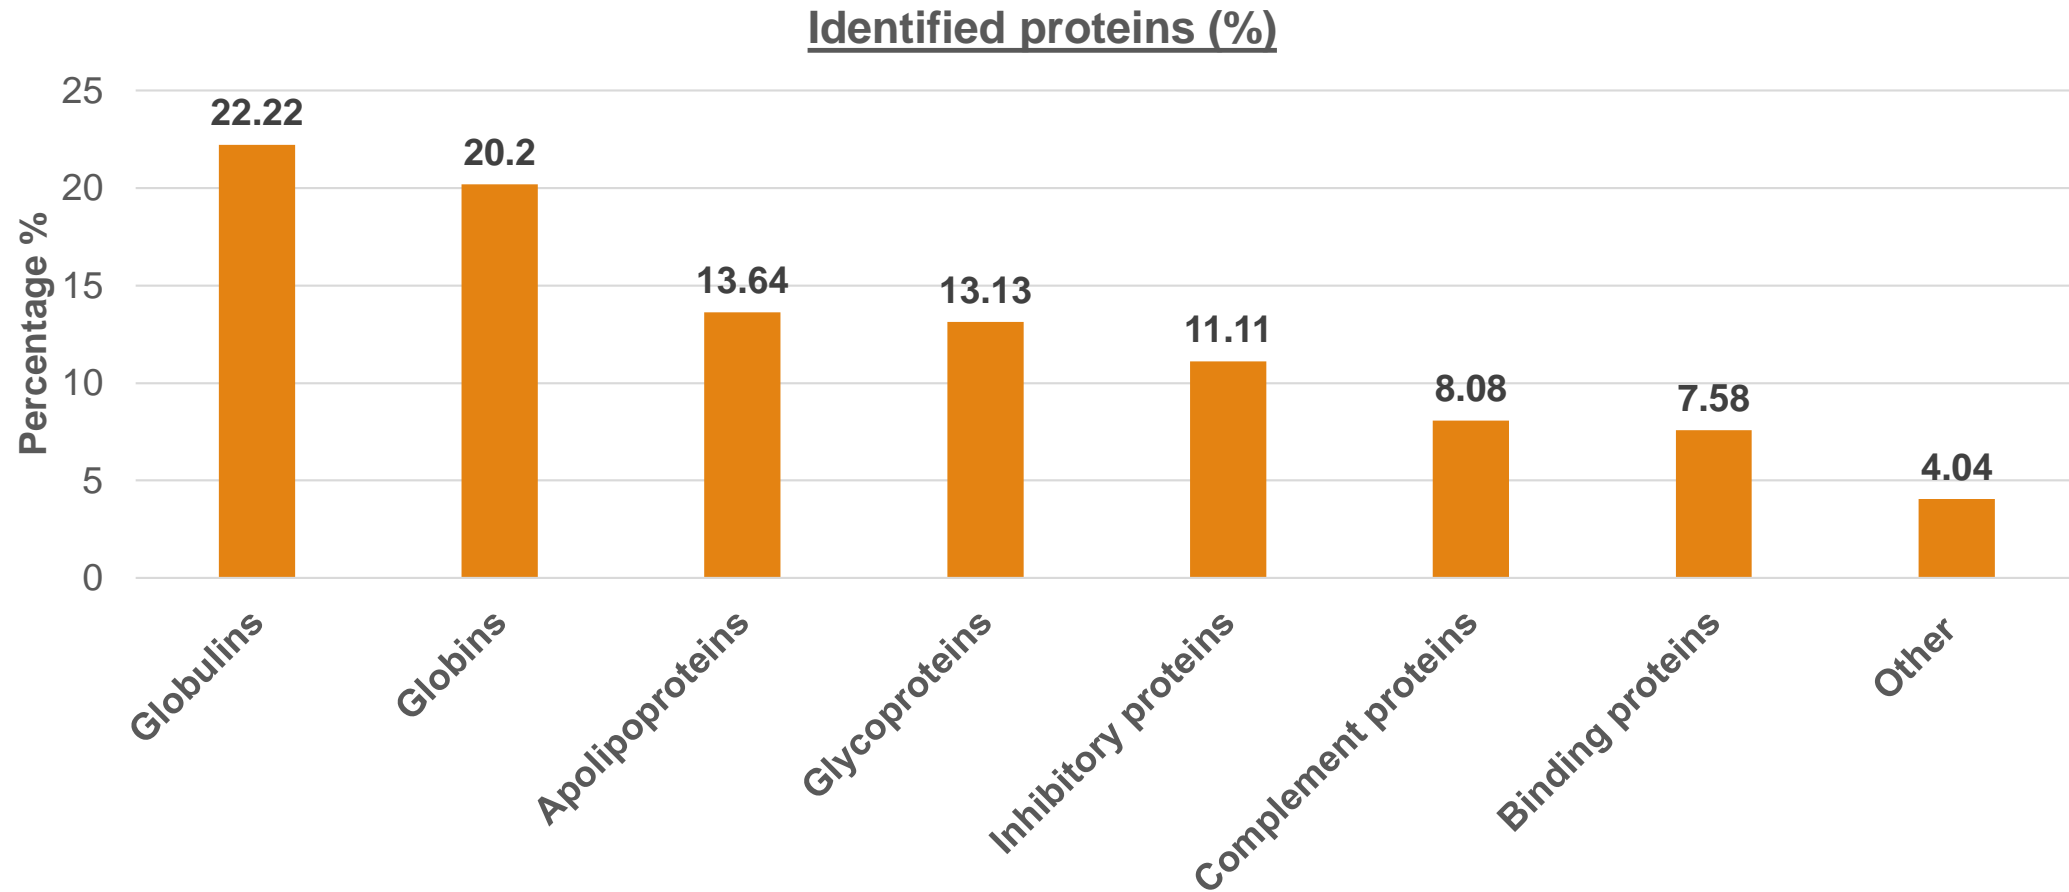

Note Other proteins: ceruloplasmin, albumin and luminal proteins

# Our results

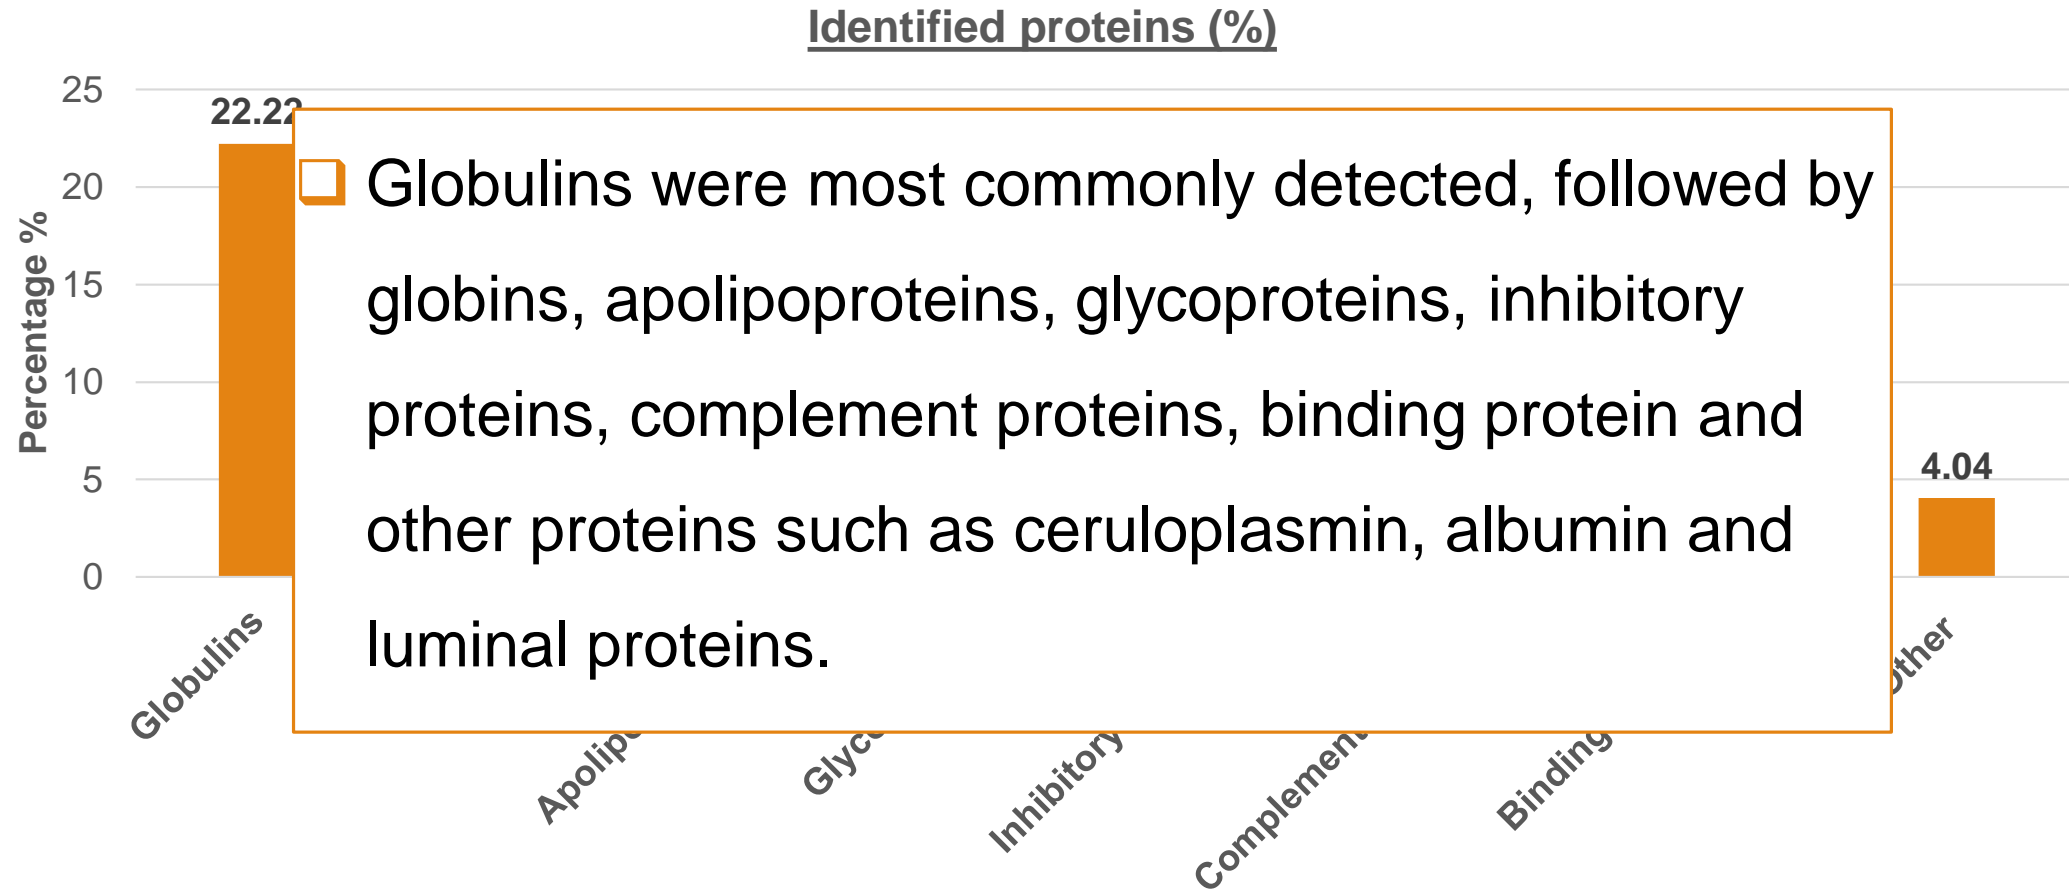

# Our results

---

- Majority of the identified proteins have functions related to:
  - Inflammation
  - Lipids transport

# Inflammation

---

- When we are sick:
  - Our immune system creates an inflammatory response so that we can heal.
  
- When inflammatory cytokines in body reach a certain threshold, our brain will initiate its own inflammatory response:
  - The macrophages will pump out more cytokines that attack both invaders and healthy tissues.

# Via neurotransmitter systems

---

- Cytokines can also alter the neurotransmitter systems involved in the development of depression.
  - Meta-analysis in 2019 demonstrated alterations of **cytokines levels** in patients with antidepressant outcomes.



# Via neurotransmitter systems

---

- C-reactive protein (CRP) is an inflammation protein marker that increases during infection.
  - Meta-analysis consists of 30 studies with 11 813 participants showed that presence of **low-grade inflammation** and elevated **CRP levels** were found in depressed patients.
  - Higher **CRP levels** was associated with depressive symptoms from Netherlands Study of Depression and Anxiety (NESDA) and UK Biobank cohorts.

# Neurotransmitter systems

---

- Monoamines neurotransmitters like dopamine, norepinephrine, and serotonin are primarily associated with the development of depression.
  - Increased **dopamine signalling** and lower levels of depressive symptoms among Asian, however, contradictory result was found among Caucasian samples.
  - Reduction of depression-like behavior was found in rat models with significantly increased **norepinephrine** levels.

# Neurotransmitter systems

---

- Neurotransmitters like glutamate and GABA are also related to depression:
  - Patients with first episode depression had significantly decreased **glutamate** and increased **GABA levels** compared to healthy controls.
- These neurotransmitters are also associated with inflammation:
  - Depressed adolescents found higher levels of **pro-inflammatory cytokines** associated with higher levels of **glutamate**.
  - Hybrid molecules targeted **GABA-A** and **serotonin 5-HT6** receptors showed **anti-inflammatory** and antidepressant activity in recent in vivo studies.

# Serum lipids and depression

---

- Serum lipids may be linked to depression via alteration of serotonin metabolism.
- Cholesterol has crucial role in brain development and in neuron-to-neuron signaling.
  - Patients with a major depressive episode show increased levels of **LDL cholesterol**.
  - **LDL cholesterol** can reduce availability of **serotonin** and increase depression risk by directly impair the function of the serotonin 1A receptor in the brain.

# Serotonin and depression

---

- A recent study found rapid response to **selective serotonin reuptake inhibitors** (SSRIs) in post-COVID depressed patients:
  - Suggests that SSRIs could be an effective depression treatment option for the **neuroinflammation** triggered by SARS-CoV-2.
- However, there is a recent review opposes the idea that serotonin cause depression:
  - Found no consistent evidence showing association between serotonin and depression.

# In short

---

- Most protein markers identified in this study were related to inflammation and lipid transport.
- Biomarkers can be used to distinguish between depressed and healthy groups.
  - Can also enhance our current diagnosis method and allowing individualized treatment.

# In short

---

## □ Future studies:

- With healthy controls are much needed to further confirm the role of these biomarkers in depression.
- Could look into the relationship between these inflammation markers and dietary patterns, so that we can modify our food intake for early prevention of depression.

# References

---

1. Mukhtar, F.; Oei, T.P.S. A Review on Assessment and Treatment for Depression in Malaysia. *Depression Research and Treatment* **2011**, *2011*, e123642, doi:10.1155/2011/123642.
2. Institute for Public Health (IPH). *The Second National Health and Morbidity Survey (NHMS 1996): Psychiatric Morbidity*; **1996**, <http://iku.moh.gov.my/images/IKU/Document/REPORT/1996/PsychiatricMorbidity.pdf>
3. Institute for Public Health (IPH). *The Third National Health and Morbidity Survey (NHMS 2006): Psychiatric Morbidity*; **2008**, <http://iku.moh.gov.my/images/IKU/Document/REPORT/2012/PsychiatricMorbidity.pdf>
4. Institute for Public Health (IPH). *National Health and Morbidity Survey 2015 (NHMS 2015): Vol. II: Non-Communicable Diseases, Risk Factors & Other Health Problems*; **2015**, <https://www.moh.gov.my/moh/resources/nhmsreport2015vol2.pdf>
5. Institute for Public Health (IPH). *National Health and Morbidity Survey (NHMS 2019): Non-Communicable Diseases, Healthcare Demand, and Health Literacy*; **2020**, [https://iku.moh.gov.my/images/IKU/Document/REPORT/NHMS2019/Infographic\\_Booklet\\_NHMS\\_2019-English.pdf](https://iku.moh.gov.my/images/IKU/Document/REPORT/NHMS2019/Infographic_Booklet_NHMS_2019-English.pdf)
6. Chua, S.N. The Economic Cost of Mental Disorders in Malaysia. *Lancet Psychiatry* **2020**, *7*, e23, doi:10.1016/S2215-0366(20)30091-2.
7. Perveen, A.; Hamzah, H.; Ramlee, F.; Othman, A.; Minhad, M. Mental Health and Coping Response among Malaysian Adults during COVID-19 Pandemic Movement Control Order. *Journal of Critical Reviews* **2020**, *7*, 2020.
8. Wong, L.P.; Alias, H.; Fuzi, A.A.M.; Omar, I.S.; Nor, A.M.; Tan, M.P.; Baranovich, D.L.; Saari, C.Z.; Hamzah, S.H.; Cheong, K.W.; et al. Escalating Progression of Mental Health Disorders during the COVID-19 Pandemic: Evidence from a Nationwide Survey. *PLOS ONE* **2021**, *16*, e0248916, doi:10.1371/journal.pone.0248916.
9. American Psychiatric Association *Diagnostic and Statistical Manual of Mental Disorders*; Fifth Edition.; American Psychiatric Association, 2013; ISBN 978-0-89042-555-8.
10. Yeoh, S.H.; Tam, C.L.; Wong, C.P.; Bonn, G. Examining Depressive Symptoms and Their Predictors in Malaysia: Stress, Locus of Control, and Occupation. *Front Psychol* **2017**, *8*, 1411, doi:10.3389/fpsyg.2017.01411.
11. Islam, Md.A.; Low, W.Y.; Tong, W.T.; Choo, C.W.Y.; Abdullah, A. Factors Associated with Depression among University Students in Malaysia: A Cross-Sectional Study | KnE Life Sciences. *The 2nd International Meeting of Public Health 2016 (IMOPH)* **2018**, 415–427, doi:10.18502/kls.v4i4.2302.
12. Yap, S.Y.; Foo, C.N.; Lim, Y.M.; Ng, F.L.; Mohd-Sidik, S.; Tang, P.Y.; Najar Singh, J.K.; Peh, K.-S. Traditional Chinese Medicine Body Constitutions and Psychological Determinants of Depression among University Students in Malaysia: A Pilot Study. *Int J Environ Res Public Health* **2021**, *18*, doi:10.3390/ijerph18105366.
13. Fata Nahas, A.R.M.; Elkalmi, R.M.; Al-Shami, A.M.; Elsayed, T.M. Prevalence of Depression Among Health Sciences Students: Findings From a Public University in Malaysia. *J Pharm Bioallied Sci* **2019**, *11*, 170–175, doi:10.4103/jpbs.JPBS\_263\_18.



# References

---

14. Hamzah, N.S.A.; Farid, N.D.N.; Yahya, A.; Chin, C.; Su, T.T.; Rampal, S.R.L.; Dahlui, M. Correction to: The Prevalence and Associated Factors of Depression, Anxiety and Stress of First Year Undergraduate Students in a Public Higher Learning Institution in Malaysia. *Journal of Child & Family Studies* **2019**, *28*, 3582–3582.
15. Talwar, P.; Othman, M.; Othman, A.E.A.; Mustafa, M.S.; Mughal, Y.H. Socio-Demographic Determinants and Prevalence of Depression, Anxiety, and Stress among Malaysian University Students. *Journal of the Indian Academy of Applied Psychology* **2017**, *43*, 296–304.
16. Teh, C.K.; Ngo, C.W.; Zulkifli, R.A. binti; Vellasamy, R.; Suresh, K. Depression, Anxiety and Stress among Undergraduate Students: A Cross Sectional Study. *Open Journal of Epidemiology* **2015**, *05*, 260, doi:10.4236/ojepi.2015.54030.
17. Shamsuddin, K.; Fadzil, F.; Ismail, W.S.W.; Shah, S.A.; Omar, K.; Muhammad, N.A.; Jaffar, A.; Ismail, A.; Mahadevan, R. Correlates of Depression, Anxiety and Stress among Malaysian University Students. *Asian J Psychiatr* **2013**, *6*, 318–323, doi:10.1016/j.ajp.2013.01.014.
18. Gan, W.Y.; Nasir, M.; Mohd Shariff, Z.; Abu Saad, H. Disordered Eating Behaviors, Depression, Anxiety and Stress among Malaysian University Students. *College Student Journal* **2011**, *45*, 296.
19. García-Gutiérrez, M.S.; Navarrete, F.; Sala, F.; Gasparian, A.; Austrich-Olivares, A.; Manzanares, J. Biomarkers in Psychiatry: Concept, Definition, Types and Relevance to the Clinical Reality. *Front Psychiatry* **2020**, *11*, 432, doi:10.3389/fpsy.2020.00432.
20. Rajewska-Rager, A.; Dmítrzak-Weglarz, M.; Kapelski, P.; Lepczynska, N.; Pawlak, J.; Twarowska-Hauser, J.; Skibinska, M. Longitudinal Assessment of S100B Serum Levels and Clinical Factors in Youth Patients with Mood Disorders. *Sci Rep* **2021**, *11*, 11973, doi:10.1038/s41598-021-91577-6.
21. Yin, X.; Cai, Y.; Zhu, Z.; Zhai, C.; Li, J.; Ji, C.; Chen, P.; Wang, J.; Wu, Y.; Chan, R.; et al. Associations of Decreased Serum Total Protein, Albumin, and Globulin with Depressive Severity of Schizophrenia. *Frontiers in Psychiatry* **2022**, *13*, 957671, doi:10.3389/fpsy.2022.957671.
22. Sun, Z.; Lin, J.; Zhang, Y.; Yao, Y.; Huang, Z.; Zhao, Y.; Zhang, P.; Fu, S. Association between Immunoglobulin A and Depression in Chinese Older Adults: Findings from a Cross-Sectional Study. *Immun Ageing* **2022**, *19*, 21, doi:10.1186/s12979-022-00283-y.
23. Kany, S.; Vollrath, J.T.; Relja, B. Cytokines in Inflammatory Disease. *Int J Mol Sci* **2019**, *20*, 6008, doi:10.3390/ijms20236008.
24. Liu, J.J.; Wei, Y.B.; Strawbridge, R.; Bao, Y.; Chang, S.; Shi, L.; Que, J.; Gadad, B.S.; Trivedi, M.H.; Kelsoe, J.R.; et al. Peripheral Cytokine Levels and Response to Antidepressant Treatment in Depression: A Systematic Review and Meta-Analysis. *Mol Psychiatry* **2020**, *25*, 339–350, doi:10.1038/s41380-019-0474-5.
25. Osimo, E.F.; Baxter, L.J.; Lewis, G.; Jones, P.B.; Khandaker, G.M. Prevalence of Low-Grade Inflammation in Depression: A Systematic Review and Meta-Analysis of CRP Levels. *Psychological Medicine* **2019**, *49*, 1958–1970, doi:10.1017/S0033291719001454.

# References

26. Milaneschi, Y.; Kappelmann, N.; Ye, Z.; Lamers, F.; Moser, S.; Jones, P.B.; Burgess, S.; Penninx, B.W.J.H.; Khandaker, G.M. Association of Inflammation with Depression and Anxiety: Evidence for Symptom-Specificity and Potential Causality from UK Biobank and NESDA Cohorts. *Mol Psychiatry* **2021**, *26*, 7393–7402, doi:10.1038/s41380-021-01188-w.
27. Shao, X.; Zhu, G. Associations Among Monoamine Neurotransmitter Pathways, Personality Traits, and Major Depressive Disorder. *Frontiers in Psychiatry* **2020**, *11*.
28. Avinun, R.; Nevo, A.; Radtke, S.R.; Brigidi, B.D.; Hariri, A.R. Divergence of an Association between Depressive Symptoms and a Dopamine Polygenic Score in Caucasians and Asians. *Eur Arch Psychiatry Clin Neurosci* **2020**, *270*, 229–235, doi:10.1007/s00406-019-01040-x.
29. Du, X.; Yin, M.; Yuan, L.; Zhang, G.; Fan, Y.; Li, Z.; Yuan, N.; Lv, X.; Zhao, X.; Zou, S.; et al. Reduction of Depression-like Behavior in Rat Model Induced by ShRNA Targeting Norepinephrine Transporter in Locus Coeruleus. *Transl Psychiatry* **2020**, *10*, 1–11, doi:10.1038/s41398-020-0808-8.
30. Draganov, M.; Vives-Gilabert, Y.; de Diego-Adeliño, J.; Vicent-Gil, M.; Puigdemont, D.; Portella, M.J. Glutamatergic and GABA-Ergic Abnormalities in First-Episode Depression. A 1-Year Follow-up 1H-MR Spectroscopic Study. *Journal of Affective Disorders* **2020**, *266*, 572–577, doi:10.1016/j.jad.2020.01.138.
31. Ho, T.C.; Teresi, G.I.; Segarra, J.R.; Ojha, A.; Walker, J.C.; Gu, M.; Spielman, D.M.; Sacchet, M.D.; Jiang, F.; Rosenberg-Hasson, Y.; et al. Higher Levels of Pro-Inflammatory Cytokines Are Associated With Higher Levels of Glutamate in the Anterior Cingulate Cortex in Depressed Adolescents. *Frontiers in Psychiatry* **2021**, *12*.
32. Marcinkowska, M.; Mordyl, B.; Fajkis-Zajackowska, N.; Siwek, A.; Karcz, T.; Gawalska, A.; Bucki, A.; Żmudzki, P.; Partyka, A.; Jastrzębska-Więsek, M.; et al. Hybrid Molecules Combining GABA-A and Serotonin 5-HT6 Receptors Activity Designed to Tackle Neuroinflammation Associated with Depression. *European Journal of Medicinal Chemistry* **2023**, *247*, 115071, doi:10.1016/j.ejmech.2022.115071.
33. Gliozzi, M.; Musolino, V.; Bosco, F.; Scicchitano, M.; Scarano, F.; Nucera, S.; Zito, M.C.; Ruga, S.; Carresi, C.; Macrì, R.; et al. Cholesterol Homeostasis: Researching a Dialogue between the Brain and Peripheral Tissues. *Pharmacological Research* **2021**, *163*, 105215, doi:10.1016/j.phrs.2020.105215.
34. Wagner, C.J.; Musenbichler, C.; Böhm, L.; Färber, K.; Fischer, A.-I.; von Nippold, F.; Winkelmann, M.; Richter-Schmidinger, T.; Mühle, C.; Kornhuber, J.; et al. LDL Cholesterol Relates to Depression, Its Severity, and the Prospective Course. *Progress in Neuro-Psychopharmacology and Biological Psychiatry* **2019**, *92*, 405–411, doi:10.1016/j.pnpbp.2019.01.010.
35. Han, A.L. Association between Lipid Ratio and Depression: A Cross-Sectional Study. *Sci Rep* **2022**, *12*, 6190, doi:10.1038/s41598-022-10350-5.
36. Mazza, M.G.; Zanardi, R.; Palladini, M.; Rovere-Querini, P.; Benedetti, F. Rapid Response to Selective Serotonin Reuptake Inhibitors in Post-COVID Depression. *European Neuropsychopharmacology* **2022**, *54*, 1–6, doi:10.1016/j.euroneuro.2021.09.009.
37. Moncrieff, J.; Cooper, R.E.; Stockmann, T.; Amendola, S.; Hengartner, M.P.; Horowitz, M.A. The Serotonin Theory of Depression: A Systematic Umbrella Review of the Evidence. *Mol Psychiatry* **2022**, 1–14, doi:10.1038/s41380-022-01661-0.
